# Supplementary material
Source: PubMed Central journal article supplement (PMC5709114)
Supplement: 2017_177675-Disclosures_and_Contributions.pdf [file 2017_177675-Disclosures_and_Contributions.pdf]

Haematologica  
HAEMATOL/2017/177675  
Version 3

Clinical relevance of silent red blood cell autoantibodies

Francesca R Mauro, Fabio Trastulli, Cristiano Alessandri, Guido Valesini, Gianluca Giovannetti, Costantino Riemma, Marika Porrizzo, Sara Pepe, Gioia Colafigli, Maria D Caputo, Maria S De Propris, Anna R Guarini, Gabriella Girelli, Serelina Coluzzi, and Robin Foà

Disclosures: None- The authors declared no conflict of interest

Contributions: FRM: designed research, provided clinical care to patients, analysed the data and wrote the manuscript. FT: retrieved relevant clinical information from patient records and analyzed data. CR: provided clinical care to patients, collected data assisted in the analysis of data. GG: performed and analyzed the immunohematological tests. CA, GV: performed and analyzed the serologic tests of patients and revised the paper critically. ARG, MSD: performed and analyzed flow-cytometry data. MP, GC, SP, MDC: provided clinical care to patients and collected data. GG and SC performed and analyzed the immunohematological tests and revised the paper critically. RF: analysed data and revised the paper critically. All authors have read and approved the final manuscript.
